# Supplementary material for: Irg1/itaconate metabolic pathway is a crucial determinant of dendritic cells immune-priming function and contributes to resolute allergen-induced airway inflammation
Source: PubMed Central journal article supplement (PMC8866123; doi:10.1038/s41385-021-00462-y), 2021-10-20
Supplement: 41385_2021_462_MOESM1_ESM.pdf [file 41385_2021_462_MOESM1_ESM.pdf]

Supplementary Figure 1.

**a**

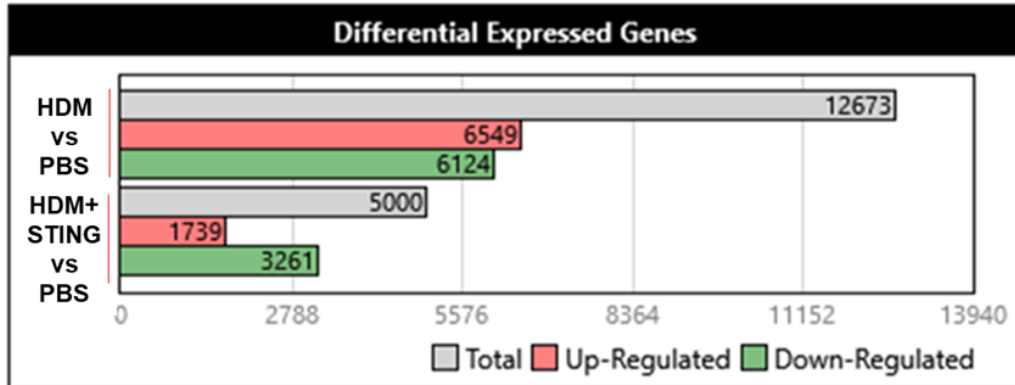

**b**

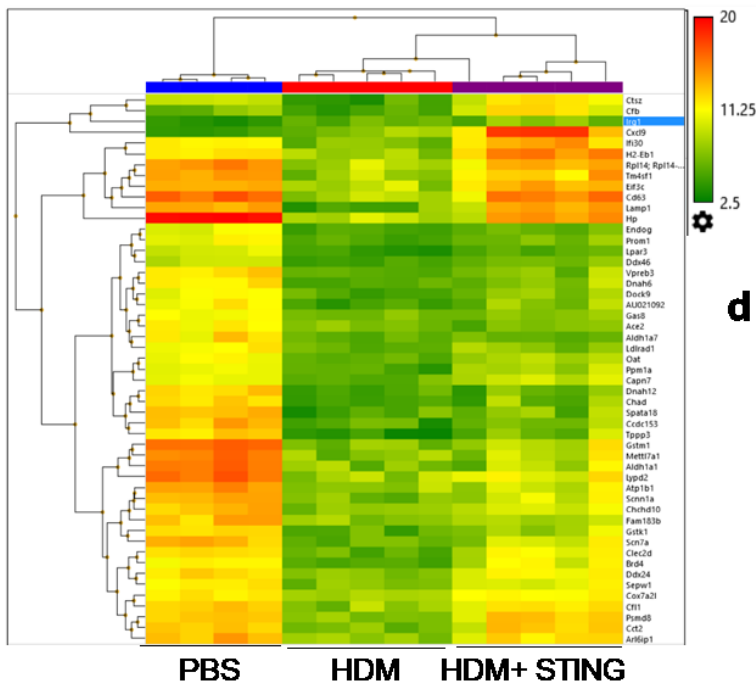

**c**

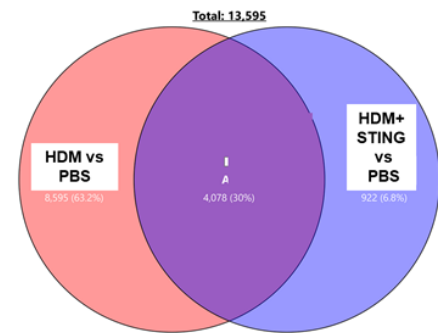

**d**

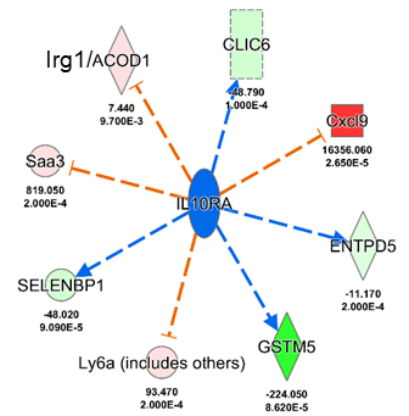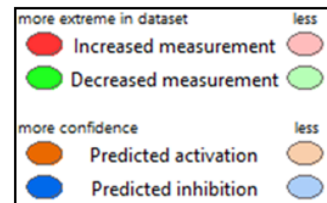

**Microarray analysis of asthmatic lungs.** **(a)** Summary of Differentially Expressed genes (DE, |Fold Change| >2; p-value < 0.05) derived from Gene expression profiling (GEP) data analysis; **(b)** Heatmap with the top 50 most DE genes based on three groups ANOVA. **(c)** The Venn diagram shows a comparison representing DE genes in Control PBS vs. HDM and HDM + STING-induced asthmatic lungs, respectively. **(d)** Top upstream network predicted by IPA based on most significant DE genes in HDM+ STING vs. PBS group.

Supplementary Figure 2.

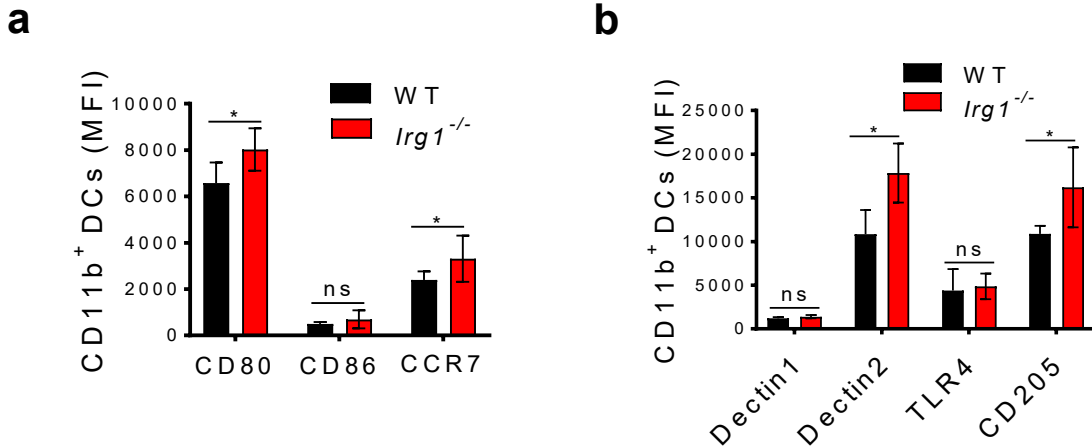

**Characterization of HDM-challenged *Irg1*<sup>-/-</sup> migratory CD11b<sup>+</sup>DCs in draining MedLN.** Mean fluorescence intensity of CD11b<sup>+</sup> DC from HDM-challenged WT and *Irg1*<sup>-/-</sup> mice **(a)** Activation markers (CD80, CD86, and CCR7) and **(b)** CLR receptors (Dectin 1 and 2), TLR4 and CD205. Data represent the mean +/- S.D. **one** of two independent experiments. (n= 4-6 mice) \**P* < 0.05 WT versus *Irg1*<sup>-/-</sup>, unpaired *t*-test.
